# Supplementary material for: Comparison of Phenolic and Flavonoid Compound Profiles and Antioxidant and α-Glucosidase Inhibition Properties of Cultivated Soybean (Glycine max) and Wild Soybean (Glycine soja)
Source: MDPI journal article supplement (doi:10.3390/plants10040813), 2021-04-20
Supplement: s1 [file s1]

## Supplementary Figure

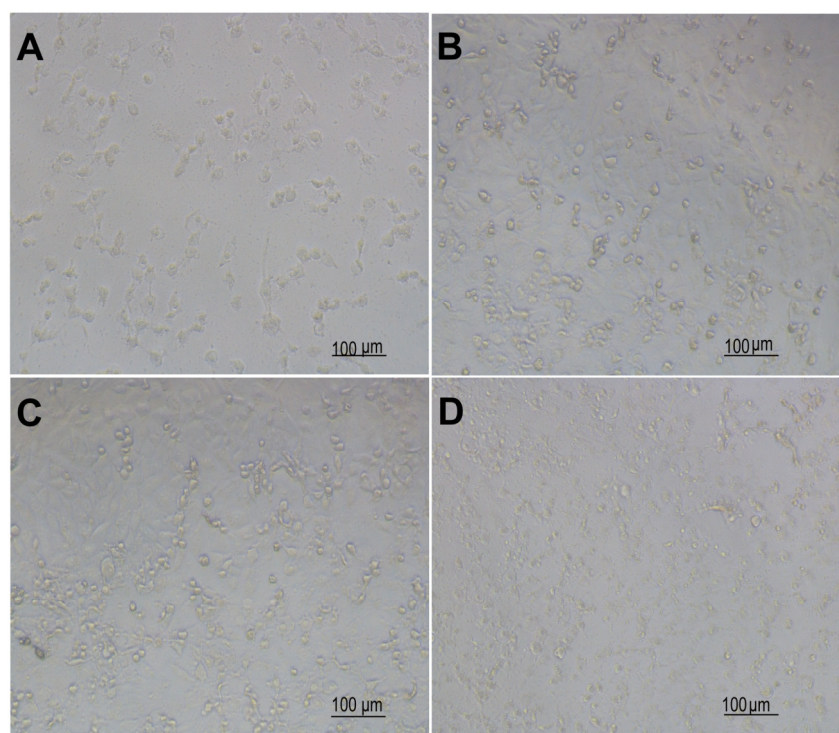

**Fig. S1.** Cell morphology of human endothelial cell following H<sub>2</sub>O<sub>2</sub> stimulation (A), acetylcysteine (B), inhibition rate after pre-incubation with WS (C) and CS (D).
