# Supplementary material for: Comparison of Phenolic and Flavonoid Compound Profiles and Antioxidant and α-Glucosidase Inhibition Properties of Cultivated Soybean (Glycine max) and Wild Soybean (Glycine soja)
Source: Plants (Basel). 2021 Apr 20;10(4):813. doi: 10.3390/plants10040813 (PMC8074397; doi:10.3390/plants10040813)
Supplement: Supplementary file 1 [file plants-10-00813-s001.zip]

Archive with 4 entries (4 files):
- plants-1172512-supplementary.pdf
- Table S1.xlsx
- Table S2.xlsx
- Table S3.xlsx
