# Supplementary material for: Comparison of Phenolic and Flavonoid Compound Profiles and Antioxidant and α-Glucosidase Inhibition Properties of Cultivated Soybean (Glycine max) and Wild Soybean (Glycine soja)
Source: Plants (Basel). 2021 Apr 20;10(4):813. doi: 10.3390/plants10040813 (PMC8074397; doi:10.3390/plants10040813)
Supplement: Supplementary file 1 [file plants-10-00813-s001.zip › Table S1.xlsx]

## Sheet: Table S1
Table S1. Flavonoid metabolites identified in soybean (Glycine soja) and wild soybean (Glycine soja).
Index	Q1 (Da)	Q3 (Da)	Rt (min)	Molecular Weight (Da)	Ionization model	KEGG ID	Compounds	Class 1	Class2	mix01	mix02	mix03	GM1	GM2	GM3	GZ1	GZ2	GZ3
pma1590	463.1	301	2.89	463.12	Protonated	-	Peonidin O-hexoside	Flavonoids	Anthocyanins	2273100	3499000	3424200	3255200	3351000	4489200	5912800	5380700	6147200
pmb0542	535.1	287.5	2.99	535.1	Protonated	-	Cyanidin 3-O-malonylhexoside	Flavonoids	Anthocyanins	443160	915610	732990	678160	855130	805860	1870400	1265500	1328000
pmb0563	301.1	286	3.95	301.1	Protonated	C08726	Peonidin	Flavonoids	Anthocyanins	893000	637070	404230	685030	728320	415650	671570	665040	699110
pmb2957	465.1	285.1	2.59	466.1	[M-H]-	-	Cyanidin O-syringic acid	Flavonoids	Anthocyanins	1080700	1467700	1882100	1843700	2219000	2742100	1385200	1590600	1752600
pmb2962	473.1	268.1	3.19	474.1	[M-H]-	-	Pelargonidin O-acetylhexoside	Flavonoids	Anthocyanins	21170	22779	30865	42217	36852	40948	9	7087.9	8278.5
pme0094	447.3	284.7	2.61	448.3	[M-H]-	C08604	Cyanidin 3-O-glucoside (Kuromanin)	Flavonoids	Anthocyanins	4646000	7096000	8702500	8128300	10212000	12731000	6904300	7617400	8934100
pme0442	303	229	2.98	303.24	Protonated	C05908	Delphinidin	Flavonoids	Anthocyanins	499000	470710	448620	400730	463640	443170	515420	453580	401880
pme1397	271	149	3.85	271.24	Protonated	C05904	Pelargonidin	Flavonoids	Anthocyanins	3158000	1694500	2557600	2076300	1979600	2809800	2062400	3363600	2486200
pme1773	595	287	2.7	595	Protonated	C08620	Cyanidin 3-O-rutinoside (Keracyanin)	Flavonoids	Anthocyanins	18621000	15459000	17263000	2362400	2684100	2875300	35236000	31270000	32314000
pme1793	595	270.9	2.38	595	Protonated	C08725	Pelargonin	Flavonoids	Anthocyanins	311260	232610	190210	893560	410470	621350	66021	97387	66800
pme3256	611	303	2.37	611	Protonated	C16315	Delphinidin 3-O-rutinoside (Tulipanin)	Flavonoids	Anthocyanins	497640	530300	470890	98840	226460	336200	1830000	1775100	1390100
pme3392	433.1	271	2.83	433.1	Protonated	-	Pelargonidin 3-O-beta-D-glucoside（Callistephin chloride)	Flavonoids	Anthocyanins	33859000	32596000	31169000	43395000	33947000	51218000	38819000	41085000	39291000
pme3609	287	213	3.54	287.24	Protonated	C05905	Cyanidin	Flavonoids	Anthocyanins	2045000	1951400	1132800	1158100	490740	611440	3147800	2378700	2367500
pmf0203	463.1	301.1	2.94	498.09	[M-Cl]+	-	Peonidin 3-O-glucoside chloride	Flavonoids	Anthocyanins	2257700	3986200	5101000	3612900	3834200	4088300	5870100	6324100	6973900
pmf0263	254	117	3.67	290.03	[M-H]-	-	Apigeninidin chloride	Flavonoids	Anthocyanins	200930	172160	201870	355120	335750	280990	79635	88977	82897
pmf0614	625.4	301	2	625.4	Protonated	-	"Peonidin 3, 5-diglucoside chloride"	Flavonoids	Anthocyanins	2169400	2776400	2645900	4218800	3452000	5623700	1428700	1538800	1698700
pma0791	521	273	4.5	520	[M+H]+	-	Naringenin O-malonylhexoside	Flavonoids	Flavanone	8924400	7084100	7289100	7967900	7441600	7947900	9280800	9017700	8923700
pmb2975	477.1	357.1	3.53	478.1	[M-H]-	-	Hesperetin O-Glucuronic acid	Flavonoids	Flavanone	177470	349550	389030	209290	168530	328050	336560	433790	320900
pme0001	609.2	301	4.07	610.19	[M-H]-	C09806	Hesperetin 7-O-neohesperidoside (Neohesperidin)	Flavonoids	Flavanone	5097400	6751800	6548700	1663800	2123300	2658700	9008600	8914400	10159000
pme0330	579.2	271	4.17	580.18	[M-H]-	C09789	Naringenin 7-O-neohesperidoside (Naringin)	Flavonoids	Flavanone	1278900	1317400	1733200	3866500	4575000	2835700	647830	726110	870580
pme0372	435.1	273	4.22	434.12	[M+H]+	C09099	Naringenin 7-O-glucoside (Prunin)	Flavonoids	Flavanone	23506000	26592000	27619000	27879000	33521000	28513000	14897000	14567000	15686000
pme0377	273.1	153	5.59	272.07	[M+H]+	C00509	Naringenin	Flavonoids	Flavanone	5028700	5350000	5781700	9732300	8626100	10717000	1536400	1625300	1601300
pme1201	273.1	167	5.56	274.08	[M-H]-	C00774	Phloretin	Flavonoids	Flavanone	223370	219770	223220	255820	258160	435010	184550	200290	222860
pme1598	463.1	301	3.85	464.13	[M-H]-	-	Hesperetin 5-O-glucoside	Flavonoids	Flavanone	13875000	18822000	19319000	17285000	25004000	24555000	14468000	16249000	18701000
pme2321	303.1	153	5.75	302.08	[M+H]+	C01709	Hesperetin	Flavonoids	Flavanone	43989	69617	45039	78802	114240	114030	26049	28124	9
pme2949	609.2	301	4.08	610.19	[M-H]-	C09755	Hesperetin 7-rutinoside (Hesperidin)	Flavonoids	Flavanone	1150400	1417600	1443000	371180	502610	576870	1743700	2061600	2308200
pme2960	273.1	153	5.57	272.07	[M+H]+	C06561	Naringenin chalcone	Flavonoids	Flavanone	4911400	5411900	5812000	11317000	8745200	11763000	1459300	1512500	1489500
pme3217	257	137	6.09	256.07	[M+H]+	C08650	Isoliquiritigenin	Flavonoids	Flavanone	604720	550280	624570	803490	514810	908230	195750	196570	225430
pme3235	255	135	5.16	256.07	[M-H]-	C09762	Liquiritigenin	Flavonoids	Flavanone	656700	719660	743520	1302100	1030600	1402100	437830	420530	485520
pme3282	273	229	3.4	274.08	[M-H]-	C09320	"Afzelechin (3,5,7,4'-Tetrahydroxyflavan)"	Flavonoids	Flavanone	222460	214000	308640	204020	198630	151250	348700	352860	433330
pmf0058	271	150.9	5.66	272.07	[M-H]-	C00509	"4',5,7-Trihydroxyflavanone"	Flavonoids	Flavanone	1568500	1748600	1760200	3687700	2857200	3920900	454890	463860	498990
pmf0108	271	242.7	4.35	272.07	[M-H]-	C09751	Garbanzol	Flavonoids	Flavanone	210860	192040	286520	740960	530540	1018600	9	9	9
pma1108	433.1	283.1	3.78	432.11	[M+H]+	-	Apigenin C-glucoside	Flavonoids	Flavone	141430	107050	147780	185570	98618	116920	94178	164140	144810
pma6216	447.1	297.1	3.84	446.1	[M+H]+	-	Acacetin C-hexoside	Flavonoids	Flavone	121960	183420	121040	140990	235230	140860	80638	126100	88125
pma6353	417.2	297.1	4	416.2	[M+H]+	-	Chrysin C-hexoside	Flavonoids	Flavone	3578100	3319100	2964700	6505400	5275900	5827000	1465600	1168000	1340200
pma6371	611.2	473.1	3.08	610.2	[M+H]+	-	"di-C,C-hexosyl-luteolin"	Flavonoids	Flavone	1027300	1617600	1639000	757870	955050	917340	3720500	4044600	4355100
pma6373	671.1	347	4.06	670.1	[M+H]+	-	"3',4',5'-Dihydrotricetin O-hexosyl-O-hexoside"	Flavonoids	Flavone	20494	43528	28066	26834	30064	35787	9	8115.3	9809.9
pma6496	449.1	299.1	3.45	448.1	[M+H]+	-	Luteolin 6-C-glucoside	Flavonoids	Flavone	982860	481780	457030	402890	319470	399780	961820	782370	771430
pma6499	509.3	347.1	3.41	508.3	[M+H]+	-	Limocitrin O-hexoside	Flavonoids	Flavone	2814300	2720300	2173900	3752300	3683000	3053700	2001300	2152300	2594400
pma6516	757.3	595.2	3.55	756.3	[M+H]+	-	C-hexosyl-apigenin O-hexosyl-O-hexoside	Flavonoids	Flavone	1070700	735120	641690	552340	553400	554960	711960	769340	647010
pma6586	567.3	405.2	4.04	566.3	[M+H]+	-	Tricin O-glycerylhexoside	Flavonoids	Flavone	418700	513850	508130	304190	432750	337470	498480	469790	544800
pma6638	477.2	315	5.3	476.2	[M+H]+	-	O-methylChrysoeriol 7-O-hexoside	Flavonoids	Flavone	78139	60163	57456	78469	9	9	9	48147	57369
pma6647	625.2	607.1	3.37	624.2	[M+H]+	-	C-hexosyl-chrysoeriol O-hexoside	Flavonoids	Flavone	89369	199940	127430	171870	138330	139140	9	133430	9
pmb0569	509.2	347.1	4.17	508.2	[M+H]+	-	Syringetin 5-O-hexoside	Flavonoids	Flavone	426610	629680	449330	201050	199260	190670	493570	503850	424770
pmb0576	519	271	4.23	518	[M+H]+	-	Apigenin O-malonylhexoside	Flavonoids	Flavone	1797500	1921200	2040700	1901400	1345700	1386800	3220100	3061400	2390300
pmb0588	611.1	449.3	3.32	610.1	[M+H]+	-	"Luteolin 3',7-di-O-glucoside"	Flavonoids	Flavone	1168500	775170	1004800	362580	9	303980	1486700	1397000	1609900
pmb0601	595.1	301.4	4.12	594.1	[M+H]+	-	Chrysoeriol O-hexosyl-O-pentoside	Flavonoids	Flavone	34225	41104	24432	22284	40228	44584	29086	41684	45171
pmb0602	509.3	347.2	4.17	508.3	[M+H]+	-	Syringetin 7-O-hexoside	Flavonoids	Flavone	323110	344960	334670	161570	67738	229080	561620	524920	578580
pmb0613	757.1	577.2	2.68	756.1	[M+H]+	-	Apigenin 6-C-hexosyl-8-C-hexosyl-O-hexoside	Flavonoids	Flavone	212250	307110	559770	451980	406940	731500	373510	428540	561400
pmb0622	611.2	473.1	3.09	610.2	[M+H]+	-	C-hexosyl-luteolin O-hexoside	Flavonoids	Flavone	977640	1893400	2053300	872810	992350	1162200	4066400	4883600	5214800
pmb0628	613.1	451.1	3.09	612.1	[M+H]+	-	Eriodictiol C-hexosyl-O-hexoside	Flavonoids	Flavone	261390	409730	479510	444010	661960	493560	421130	803730	392330
pmb0644	449.1	299.2	3.45	448.1	[M+H]+	-	Luteolin C-hexoside	Flavonoids	Flavone	903580	577870	498080	428440	327550	468380	895210	843020	683300
pmb0645	627.1	465.2	3.41	626.1	[M+H]+	-	6-C-hexosyl-hesperetin O-hexoside	Flavonoids	Flavone	1481500	1485900	1395200	854240	942620	892930	1925900	2062400	2064500
pmb0653	595.1	463.1	3.68	594.1	[M+H]+	-	"di-C,C-hexosyl-apigenin"	Flavonoids	Flavone	269920	191760	272910	77302	100750	69735	298390	193280	370890
pmb0663	611.1	317.1	3.75	610.1	[M+H]+	-	8-C-hexosyl-luteolin O-hexoside	Flavonoids	Flavone	22378	14786	13007	26460	7259.8	19253	28236	16850	66355
pmb0673	403.1	367.1	4.3	402.1	[M+H]+	-	Apigenin 6-C-pentoside	Flavonoids	Flavone	245210	251550	164000	203640	243850	240260	214730	226030	228560
pmb0674	685.1	367.5	4.1	684.1	[M+H]+	-	C-pentosyl apigenin O-salicyloyl hexoside	Flavonoids	Flavone	170740	132520	267610	302100	292220	302870	168290	143530	327690
pmb0675	711.2	367.1	4.1	710.2	[M+H]+	-	C-pentosyl-apigenin O-p-coumaroylhexoside	Flavonoids	Flavone	17988	14593	31172	9	9177.7	17966	16820	28777	28080
pmb0681	403.1	367	4.32	402.1	[M+H]+	-	Apigenin 8-C-pentoside	Flavonoids	Flavone	145400	182400	173660	170430	144910	138480	186240	241980	177260
pmb0689	463.1	331.2	4.75	462.1	[M+H]+	-	Chrysoeriol C-hexoside	Flavonoids	Flavone	634080	480370	541490	241530	432030	384340	596310	682570	861070
pmb0693	565.1	433.3	3.39	564.1	[M+H]+	-	C-hexosyl-apigenin C-pentoside	Flavonoids	Flavone	52495	43940	49996	9	9	9	28915	59201	52441
pmb0696	625	463	3.46	624	[M+H]+	-	8-C-hexosyl chrysoeriol O-hexoside	Flavonoids	Flavone	764680	535050	733490	1108700	1603300	908770	247850	253390	222380
pmb0701	463.1	313.2	3.89	462.1	[M+H]+	-	Chrysoeriol 8-C-hexoside	Flavonoids	Flavone	304650	236800	189570	224320	288170	239180	245280	103130	187040
pmb0720	579.1	331.1	4.56	578.1	[M+H]+	-	Tricin O-malonylhexoside	Flavonoids	Flavone	204150	213200	257300	215130	130600	173260	9	9	258130
pmb0724	477.1	331.1	4.99	476.1	[M+H]+	-	Tricin O-rhamnoside	Flavonoids	Flavone	124630	78511	81829	9	40617	28342	185090	150670	130890
pmb0735	507.1	331.2	4.18	506.1	[M+H]+	-	Tricin O-glucuronic acid	Flavonoids	Flavone	204590	169980	170120	139120	214850	157870	157000	224420	201800
pmb0736	493.1	331	4.3	492.1	[M+H]+	-	Tricin 7-O-hexoside	Flavonoids	Flavone	297070	289650	343640	197410	228710	232540	334450	318460	373380
pmb0746	527.1	331	5.84	526.1	[M+H]+	-	Tricin 4'-O-β-guaiacylglycerol	Flavonoids	Flavone	24991	28821	35203	13677	9109.3	9	54859	43510	45547
pmb2850	329	314	5.73	330	[M-H]-	-	Tricin	Flavonoids	Flavone	11681	11931	19580	9130.6	8822.9	7193.1	18187	15280	19318
pmb2969	625.1	445.2	2.47	626.1	[M-H]-	-	Hesperetin C-hexoside O-hexoside	Flavonoids	Flavone	86109	85096	91851	46315	53338	58461	125400	134720	111610
pmb2978	563.1	269.1	4.04	564.1	[M-H]-	-	Apigenin O-hexosyl-O-pentoside	Flavonoids	Flavone	69615	166150	153300	150490	191480	219340	71806	91339	184660
pmb2984	491.1	287.1	5.09	492.1	[M-H]-	-	Acetyl-eriodictyol O-hexoside	Flavonoids	Flavone	19160	23483	31080	9	14431	9	20458	37991	14256
pmb2999	461.1	299.1	3.87	462.1	[M-H]-	-	Chrysoeriol 5-O-hexoside	Flavonoids	Flavone	5686700	7446200	8960300	8753900	12273000	12791000	5854200	6047100	7616200
pmb3002	607.1	299	3.98	608.1	[M-H]-	-	Chrysoeriol 7-O-rutinoside	Flavonoids	Flavone	752430	915220	927200	241610	369900	512550	938210	1016300	1077000
pmb3006	431.1	269.1	4.21	432.1	[M-H]-	C04608	Apigenin 7-O-glucoside (Cosmosiin)	Flavonoids	Flavone	12000000	13149000	13353000	18248000	16924000	16320000	5130800	7225300	6405600
pmb3012	461.1	299.2	4.32	462.1	[M-H]-	-	Chrysoeriol 7-O-hexoside	Flavonoids	Flavone	922630	789130	735890	883270	1071100	794400	911470	827610	959370
pmb3023	449.1	287	3.37	450.1	[M-H]-	-	Eriodictyol C-hexoside	Flavonoids	Flavone	65977000	62208000	58416000	79131000	67684000	59548000	60704000	61170000	48806000
pmb3042	491.1	329.1	4	492.1	[M-H]-	-	Tricin 5-O-hexoside	Flavonoids	Flavone	3339900	4338100	5036700	6909900	8203800	8554200	2437700	2979900	3352700
pmb3043	637.1	329.2	4.07	638.1	[M-H]-	-	Tricin 5-O-rutinoside	Flavonoids	Flavone	894370	1173600	1310600	270900	419640	486820	1506900	1254200	1454700
pmb3044	653.1	329.2	4.16	654.1	[M-H]-	-	Tricin di-O-hexoside	Flavonoids	Flavone	245830	261220	305690	72668	73737	85745	401790	428750	438560
pme0333	579.2	271	4.01	578.16	[M+H]+	C12627	Apigenin 7-O-neohesperidoside (Rhoifolin)	Flavonoids	Flavone	509460	500740	475160	190450	80832	92763	2119300	1763200	1904500
pme0359	433.1	271	3.81	432.11	[M+H]+	-	Apigenin 5-O-glucoside	Flavonoids	Flavone	6755700	6802000	4126000	10880000	9584900	9275400	3582400	4345600	3482400
pme0364	301.1	286	5.77	300.06	[M+H]+	C04293	Chrysoeriol	Flavonoids	Flavone	3222300	3386800	3189100	4668100	4583500	5199300	2566000	2434700	2576200
pme0374	431.1	311	3.79	432.11	[M-H]-	C01714	Isovitexin	Flavonoids	Flavone	59414	86230	104500	137580	118000	81595	28828	49721	49549
pme0379	271.1	153	5.63	270.05	[M+H]+	C01477	Apigenin	Flavonoids	Flavone	1722600	1744100	1748400	3276100	2863700	3518300	615850	549630	535810
pme1510	269.1	251	5.94	270.05	[M-H]-	C10023	"Baicalein (5,6,7-Trihydroxyflavone)"	Flavonoids	Flavone	110420	116800	106960	237740	178390	249830	47259	37482	33773
pme1518	403.1	373	7.06	402.13	[M+H]+	C10112	Nobiletin	Flavonoids	Flavone	443130	498580	512390	573030	527010	527190	538290	534540	507960
pme1541	283.1	268	7.06	284.07	[M-H]-	C01470	Acacetin	Flavonoids	Flavone	30007	40318	26852	120600	9	77082	9	9	9
pme1550	373.1	343	7.54	372.12	[M+H]+	C10190	Tangeretin	Flavonoids	Flavone	453830	426880	390080	390160	387760	380390	396920	417220	365150
pme1601	417.1	271	4.9	416.11	[M+H]+	-	Apigenin 4-O-rhamnoside	Flavonoids	Flavone	139540	93573	71910	176740	82326	147080	9	9	168820
pme1611	433.1	313	3.75	434.12	[M-H]-	-	Isohemiphloin	Flavonoids	Flavone	500980	767740	766860	853250	750010	790000	550300	648290	698230
pme2457	447.3	285.2	3.87	448.1	[M-H]-	-	Luteolin 7-O-glucoside (Cynaroside)	Flavonoids	Flavone	724620	794350	963670	2196000	1952000	1728000	198570	245600	220210
pme3224	577	413	3.67	578.16	[M-H]-	C12628	Vitexin 2''-O-beta-L-rhamnoside	Flavonoids	Flavone	19621	18548	24050	8524.6	8756.7	9	18997	32341	24072
pme3303	303	257	4.51	302.04	[M+H]+	C10192	Tricetin	Flavonoids	Flavone	135380	100660	179800	107470	142380	140280	92324	9	9
pme3473	271.1	151	5.59	272.07	[M-H]-	C09614	Butin	Flavonoids	Flavone	1835900	2013400	2055300	4435600	3457200	4446700	567550	531400	537390
pme3507	253.1	117	4.75	254.06	[M-H]-	C12123	"7,4'-Dihydroxyflavone"	Flavonoids	Flavone	154910	160580	163070	145550	163650	172570	222100	164700	229680
pmf0005	579.2	271	4.05	580.53	[M-H]-	C09793	Narirutin	Flavonoids	Flavone	767090	705690	928130	2136300	2715400	1516400	368830	401930	567950
pmf0011	593.2	473	3.19	594.16	[M-H]-	-	"Apigenin 6,8-C-diglucoside"	Flavonoids	Flavone	46498	61512	58247	64241	63710	62735	40448	35743	31431
pmf0012	595.2	457.2	3.18	594.16	[M+H]+	-	"6,8-di-C-glucoside Apigenine"	Flavonoids	Flavone	77196	66230	45531	154170	113670	108090	100730	57284	127660
pmf0057	271.1	151	5.66	272.07	[M-H]-	C06561	"4,2',4',6'-Tetrahydroxychalcone "	Flavonoids	Flavone	1713200	1994900	2054300	4162000	3191700	4369100	477970	522510	547650
pme1667	595.2	415	3.36	594.16	[M+H]+	C08064	Isovitexin 7-O-glucoside (Saponarin)	Flavonoids	Flavonoid	165230	166720	132880	190830	170880	201980	79007	51431	132670
pmf0109	312.9	253	7.13	314.08	[M-H]-	-	3-O-Acetylpinobanksin	Flavonoids	Flavonoid	12369	6847.2	6038.9	6947.4	9021.7	9746.9	12903	12452	15404
pmf0179	623.2	315.1	4.04	624.17	[M-H]-	-	Narcissoside	Flavonoids	Flavonoid	70929	96853	82294	56707	54329	53060	92878	129320	129180
pmf0204	465.1	303	3.73	464.1	[M+H]+	-	Hyperoside	Flavonoids	Flavonoid	1503400	549330	984900	226810	137160	432730	1958900	2711300	1573500
pmf0208	465.1	303	3.9	464.1	[M+H]+	-	Isoquercitroside	Flavonoids	Flavonoid	961230	1353700	1689900	186250	282750	234670	676340	1196600	1413800
pmf0246	449.1	327	3.56	448.1	[M-H]-	C10114	Orientin	Flavonoids	Flavonoid	19762	26130	16019	7996.2	10949	14909	33146	40200	25900
pmf0275	303	121.3	5.13	302.04	[M+H]+	-	Herbacetin	Flavonoids	Flavonoid	164220	162600	165730	183790	187740	228650	146520	110040	121730
pmf0279	465.1	229.2	3.81	464.1	[M+H]+	-	Gossypitrin	Flavonoids	Flavonoid	59302	79144	80592	57614	87365	47563	53540	60408	57939
pmf0301	433.1	269.1	4.3	434.12	[M-H]-	-	Engeletin	Flavonoids	Flavonoid	966430	1067700	1177400	1682700	1531200	1576300	601040	614090	593430
pmf0330	607.2	445	3.67	608.17	[M-H]-	C17834	Spinosin	Flavonoids	Flavonoid	44011	17037	33894	58459	84594	56096	9	9	28791
pmf0360	449.1	151	3.97	450.12	[M-H]-	C17449	Astilbin	Flavonoids	Flavonoid	89526	98915	133180	125720	132100	164550	72605	73028	88364
pmf0372	317.1	302	4.72	316.06	[M+H]+	C10119	Pedalitin	Flavonoids	Flavonoid	558470	597080	624650	234510	172940	250280	875460	974270	764150
pmf0374	477.1	314	4.19	478.11	[M-H]-	-	Isorhamnetin 3-O-glucoside	Flavonoids	Flavonoid	65507	103850	140350	92257	110870	158750	99797	76633	117760
pmf0383	345.1	284	6.68	344.09	[M+H]+	C19807	"5,7-Dihydroxy-3',4',5'-trimethoxyflavone"	Flavonoids	Flavonoid	245270	232570	237530	9	9	9	466880	459840	430260
pmf0417	595.2	287	3.7	596.17	[M-H]-	C09732	Eriocitrin	Flavonoids	Flavonoid	32852	40924	52645	29379	38659	43674	40551	34623	36589
pmf0472	565.2	271.1	4.06	564.15	[M+H]+	C04858	Apiin	Flavonoids	Flavonoid	4727400	4537500	4919200	3248800	6439500	5567500	4411200	5044600	4207100
pmf0492	415	267	3.12	416.11	[M-H]-	C10524	Puararin	Flavonoids	Flavonoid	470420	409600	388300	583720	450200	300100	320910	326880	275280
pmf0521	303	229	5.13	302.04	[M+H]+	C10105	Morin	Flavonoids	Flavonoid	162490	219090	185760	259010	251760	330960	121400	88808	116930
pmf0549	607.2	299	4.14	608.17	[M-H]-	C10039	Diosmin	Flavonoids	Flavonoid	3805900	4665200	5370000	1833700	2327700	2459100	4566000	4927200	6197200
pmf0568	301.1	168	5.69	300.06	[M+H]+	C10534	Tectorigenin	Flavonoids	Flavonoid	425730	466300	437820	599590	617420	697840	349110	306570	355520
pmf0570	419.1	257	3.87	418.13	[M+H]+	C16978	Liquiritin	Flavonoids	Flavonoid	43139000	50909000	48095000	55230000	51026000	50899000	48105000	41089000	42686000
pmf0583	435.1	167	4.36	436.14	[M-H]-	C01604	Phloridzin	Flavonoids	Flavonoid	2278400	2079800	1860200	1423500	1387500	1117700	3480700	4183700	3534000
pma1116	301.1	286	4.13	300.1	[M+H]+	C10098	Kaempferide	Flavonoids	Flavonol	1668300	1888800	1592300	1498900	1835300	1217100	1584600	1600100	1634900
pma6639	479.2	317.2	4.17	478.2	[M+H]+	-	Isorhamnetin O-hexoside	Flavonoids	Flavonol	438880	198530	263250	142850	229290	200650	582850	258500	9
pmb0565	509.1	347.2	3.41	508.1	[M+H]+	-	Syringetin 3-O-hexoside	Flavonoids	Flavonol	3242700	2664900	2079500	3176000	3230100	3825300	2519700	2392300	2554600
pmb0711	611.2	303.1	3.7	610.2	[M+H]+	-	Quercetin 7-O-rutinoside	Flavonoids	Flavonol	894470	588740	864720	109810	172450	125760	1018000	996320	2681100
pmb3894	329.1	229.1	5.91	330.1	[M-H]-	-	Di-O-methylquercetin	Flavonoids	Flavonol	4496600	4900800	4760300	15617000	6516200	10450000	1059300	396030	659900
pme0196	285	151	5.73	286.05	[M-H]-	C05903	Kaempferol	Flavonoids	Flavonol	47679	37149	36419	68768	60034	72911	18909	24835	19677
pme0202	611.2	303	3.7	610.15	[M+H]+	C05625	Quercetin 3-O-rutinoside (Rutin)	Flavonoids	Flavonol	75337	72235	88674	183310	156340	188340	48029	52859	9
pme0369	593.2	285	3.83	594.16	[M-H]-	-	Kaempferol 3-O-rutinoside (Nicotiflorin)	Flavonoids	Flavonol	3443000	4517800	5435200	3967200	4366500	4268000	4365400	4311100	5053700
pme1478	317	151	4.7	318.04	[M-H]-	C10107	Myricetin	Flavonoids	Flavonol	37478	32280	38666	68850	82930	108890	9	23348	28977
pme1521	303.1	125	4.15	304.06	[M-H]-	C01617	Dihydroquercetin (Taxifolin)	Flavonoids	Flavonol	184880	176280	231000	130080	138590	119560	208260	228490	232090
pme1540	625.2	317	3.66	624.17	[M+H]+	-	Isorhamnetin 3-O-neohesperidoside	Flavonoids	Flavonol	75715	94814	68652	32087	9	58305	190640	213740	138360
pme1605	593.2	285	3.76	594.16	[M-H]-	-	Kaempferol 3-O-robinobioside (Biorobin)	Flavonoids	Flavonol	3362800	4296300	4964800	3785700	3815100	4199200	4113600	4447500	4772800
pme1622	447.1	285	3.93	448.1	[M-H]-	C12249	Kaempferol 3-O-glucoside (Astragalin)	Flavonoids	Flavonol	914290	993590	1063700	1427100	1584600	1502000	653440	748580	752830
pme2493	579.2	287.1	3.74	578.16	[M+H]+	C16981	"Kaempferol 3,7-dirhamnoside (Kaempferitrin)"	Flavonoids	Flavonol	1687500	1837500	1629900	747980	921020	1086300	10512000	9171500	7977100
pme2898	321.1	303	3.52	320.05	[M+H]+	C02906	Dihydromyricetin	Flavonoids	Flavonol	535170	440480	403480	1571900	1462600	1638600	116630	233650	228980
pme2954	303	153	5.13	302.04	[M+H]+	C00389	Quercetin	Flavonoids	Flavonol	77840	125780	156850	147740	187520	179100	70724	50448	41554
pme2977	347.3	285	6.66	346.25	[M+H]+	-	Troxerutin (Trihydroxyethyl rutin)	Flavonoids	Flavonol	2006800	2010500	1744000	1836900	2201800	3224600	2502300	3048900	2928200
pme3129	463	301	3.86	464.1	[M-H]-	-	Quercetin 4'-O-glucoside (Spiraeoside)	Flavonoids	Flavonol	12411000	15985000	18827000	15655000	22004000	24747000	13031000	14063000	16392000
pme3211	463	301	3.86	464.1	[M-H]-	C05623	Quercetin 3-O-glucoside (Isotrifoliin)	Flavonoids	Flavonol	12380000	14853000	17025000	16023000	20135000	23176000	12461000	14382000	16716000
pme3267	447	285	3.86	448.1	[M-H]-	C12626	Kaempferol 3-O-galactoside (Trifolin)	Flavonoids	Flavonol	1153200	1246000	1302600	3599500	3184400	3472300	334660	402860	403900
pme3290	331	316	6.63	330.07	[M+H]+	C01265	"3,7-Di-O-methylquercetin"	Flavonoids	Flavonol	46470	35517	38582	9	9	9	82453	70387	84724
pme3393	287	149	3.65	288.06	[M-H]-	C01378	Fustin	Flavonoids	Flavonol	22970000	21971000	18077000	12765000	13053000	13346000	23841000	22816000	20383000
pme3401	345	330	5.78	346.07	[M-H]-	C11620	Syringetin	Flavonoids	Flavonol	20683	32754	21540	14855	18773	25290	45555	34871	26450
pme3468	739.2	593	3.35	740.22	[M-H]-	C10178	Kaempferol-3-O-robinoside-7-O-rhamnoside (Robinin)	Flavonoids	Flavonol	83885	70554	102990	48813	55601	56462	79215	75500	80491
pme0355	255.1	137	4.97	254.06	[M+H]+	C10208	Daidzein	Flavonoids	Isoflavone	29903000	17610000	15599000	18489000	25294000	18307000	18052000	11100000	12598000
pme1496	267.1	252	6.33	268.07	[M-H]-	C00858	Formononetin (4'-O-methyldaidzein)	Flavonoids	Isoflavone	107760	90055	93212	208210	82524	187760	102280	66615	88360
pme1578	271.1	215	5.52	270.05	[M+H]+	C06563	"Genistein (4',5,7-Trihydroxyisoflavone)"	Flavonoids	Isoflavone	2164900	2298200	2198200	3986000	3223600	4117000	802780	679550	714090
pme1587	417.1	255	3.36	416.11	[M+H]+	C10216	Daidzein 7-O-glucoside (Daidzin)	Flavonoids	Isoflavone	14149000	15060000	15569000	11366000	13897000	13054000	12508000	11661000	9317200
pme3208	445	283	3.54	446.12	[M-H]-	C16195	Glycitin	Flavonoids	Isoflavone	4170700	4260300	4392800	7049300	7124800	5845200	2685900	2924500	3204800
pme3210	433	271	4.01	432.11	[M+H]+	C09126	Genistein 7-O-Glucoside (Genistin)	Flavonoids	Isoflavone	5009600	6498500	6773400	7077900	8067100	7807400	3421400	3734400	4030300
pme3233	285	270	5	284.07	[M+H]+	C01562	Calycosin	Flavonoids	Isoflavone	3054800	3093400	3128900	4695900	5416800	5363800	1825000	1556000	1525400
pme3252	285	270	5.13	284.07	[M+H]+	C14536	Glycitein	Flavonoids	Isoflavone	3139300	3318500	3449700	5149400	5713300	6047600	1945200	1714900	1601100
pme3258	269	241	4.48	270.05	[M-H]-	C14314	6-Hydroxydaidzein	Flavonoids	Isoflavone	12090000	11898000	13256000	15041000	13470000	13797000	15972000	15909000	15001000
pme3263	269	225	4.43	270.05	[M-H]-	C02495	2'-Hydroxydaidzein	Flavonoids	Isoflavone	2117500	2443300	2216200	2341300	2166600	2155300	2715000	2802500	2675000
pme3279	287	153	4.89	286.05	[M+H]+	C12134	2'-Hydroxygenistein	Flavonoids	Isoflavone	612360	663360	500060	824990	1392700	1013500	9	9	9
pme3292	283	268	6.97	284.07	[M-H]-	C10521	Prunetin	Flavonoids	Isoflavone	26408	41797	24691	132740	9	77568	9	9	9
pme3400	447.1	285	5.16	446.12	[M+H]+	C05376	Sissotrin	Flavonoids	Isoflavone	268910	340040	329980	455520	317450	645300	69565	92187	52842
pmb2586	593.1	285.6	3.72	594.1	[M-H]-	-	Gallocatechin-catechin	Flavonoids	Polyphenol	14232	13477	19058	18789	9	12453	13438	21764	20979
pmb2831	315.1	153.1	2.44	316.1	[M-H]-	-	Protocatechuic acid O-glucoside	Flavonoids	Polyphenol	3538700	4095800	4478500	3019700	3068500	4090100	5300500	4941900	4500100
pmb2947	865.1	407.1	3.44	866.1	[M-H]-	-	Catechin-catechin-catechin	Flavonoids	Polyphenol	73519	70876	99547	37261	36725	53560	290580	251000	505720
pmb3114	561.1	289.2	3.61	562.1	[M-H]-	-	Epicatechin-epiafzelechin	Flavonoids	Polyphenol	239200	202340	224240	214060	156880	284290	253970	280820	270010
pme0205	289.1	245	3	290.08	[M-H]-	C06562	Catechin	Flavonoids	Polyphenol	1991600	2143900	2428300	1519400	1789600	1718000	2306700	2821600	2606100
pme0460	291	139	3.32	290.3	[M+H]+	C09727	L-Epicatechin	Flavonoids	Polyphenol	2862400	2907600	2637300	1165000	1313100	1452700	3444600	3842300	3770000
pme1488	459	139	3.32	458.09	[M+H]+	C09731	Epigallate catechin gallate (EGCG)	Flavonoids	Polyphenol	185400	182400	148700	116410	98898	122510	209630	245560	220300
pme1516	307	139	2.76	306	[M+H]+	C12136	Epigallocatechin (EGC)	Flavonoids	Polyphenol	1427000	1397300	1238900	2044300	2444200	2509000	1121600	1361700	1435500
pme1537	307	139	2.27	306.07	[M+H]+	C12127	(+)-Gallocatechin (GC)	Flavonoids	Polyphenol	1404800	1455600	1984500	1891400	2212200	2617600	1322200	1415900	1636700
pme1562	441.3	169	3.89	442.3	[M-H]-	-	Epicatechin gallate (ECG)	Flavonoids	Polyphenol	27651	26839	37296	19790	20767	26706	36193	34093	44668
pme1824	153.1	109	2.48	154.03	[M-H]-	C00230	Protocatechuic acid	Flavonoids	Polyphenol	19651000	23162000	23318000	42923000	45729000	51271000	6808000	7104400	7135000
pme2247	303	285	6.57	302.01	[M+H]+	C10788	Ellagic acid	Flavonoids	Polyphenol	1097100	980740	855990	1384600	1624400	2036400	2274100	2057900	2624400
pme2478	137.1	108.4	3.06	138.03	[M-H]-	C16700	Protocatechuic aldehyde	Flavonoids	Polyphenol	246610	214940	268650	348180	388970	361220	9	9	9
pmf0345	275.1	107	3.74	274.08	[M+H]+	C12128	(-)-Epiafzelechin	Flavonoids	Polyphenol	5381800	5076100	4901300	6852100	8353400	6950900	2968500	3560400	2871700
pmf0379	457.1	169	3.44	458.08	[M-H]-	-	Gallocatechin gallate	Flavonoids	Polyphenol	54953	28495	40541	35804	55742	36120	14732	46126	43750
pmf0458	295.2	277	7.08	294.18	[M+H]+	C10462	6-Gingerol	Flavonoids	Polyphenol	3967300	4275600	5338600	11586000	5911500	10190000	915450	501500	369980
pme0430	575	285	3.68	576.13	[M-H]-	-	Procyanidin A1	Flavonoids	Proanthocyanidins	37186	36976	30296	9	9	9	40490	9	29062
pme0432	575	285	4.06	576.13	[M-H]-	C10237	Procyanidin A2	Flavonoids	Proanthocyanidins	144560	195790	208180	129110	153240	155520	553340	535800	764010
pme0434	577	407.1	3.03	578.14	[M-H]-	-	Procyanidin B2	Flavonoids	Proanthocyanidins	5000300	5903900	5686500	2966900	3859800	4642900	13263000	12123000	14265000
pme0436	577.1	407.1	2.79	578.14	[M-H]-	-	Procyanidin B3	Flavonoids	Proanthocyanidins	17196	17979	22512	6609.4	7320.9	14588	43616	43790	49683
