# Supplementary material for: Comparison of Phenolic and Flavonoid Compound Profiles and Antioxidant and α-Glucosidase Inhibition Properties of Cultivated Soybean (Glycine max) and Wild Soybean (Glycine soja)
Source: Plants (Basel). 2021 Apr 20;10(4):813. doi: 10.3390/plants10040813 (PMC8074397; doi:10.3390/plants10040813)
Supplement: Supplementary file 1 [file plants-10-00813-s001.zip › Table S2.xlsx]

## Sheet: Sheet1
Table S2. Different flavonoid metabolites between soybean (Glycine max) and Wild soybean (Glycine soja).
Index	Compounds	Class 1	Class 2	GZ1	GZ2	GZ3	GM1	GM2	GM3	VIP	Fold_Change	Log2FC	Type
pme1773	Cyanidin 3-O-rutinoside (Keracyanin)	Flavonoids	Anthocyanins	35236000	31270000	32314000	2362400	2684100	2875300	1.20952	0.0801639	-3.6409	down
pmf0578	Citric acid monohydrate		Organic acids and derivatives	9	9	9	6738500	7309400	7503200	1.2114	798189	19.6064	up
pme1684	D-(+)-Glucono-1,5-lactone		Carbohydrates	320440	308500	282430	9	9	9	1.2114	2.96257e-05	-15.0428	down
pme3569	Scoparone		Phenylpropanoids	4519700	5170800	4345100	9	9	9	1.2114	1.92368e-06	-18.9877	down
pmf0263	Apigeninidin chloride	Flavonoids	Anthocyanins	79635	88977	82897	355120	335750	280990	1.20309	3.86412	1.95014	up
pme1646	Pinoresinol		Phenylpropanoids	9	9	9	44211	42161	45303	1.21139	4876.85	12.2517	up
pme0239	2–furanoic acid		Organic acids and derivatives	24172000	29520000	25821000	9	9	9	1.21138	3.39567e-07	-21.4898	down
pme2362	Mandelic acid		Organic acids and derivatives	151820	133190	127490	9	9	9	1.21135	6.54545e-05	-13.8991	down
pmb2784	13-HOTrE		Lipids	45996	40987	45119	9	9	9	1.21133	0.000204388	-12.2564	down
pme2603	3-Hydroxyanthranilic acid		Organic acids and derivatives	9	9	9	216440	239000	284380	1.21129	27400.7	14.7419	up
pme1712	L-Saccharopine		Amino acid and derivatives	87478	106140	106070	9	9	9	1.21128	9.00937e-05	-13.4382	down
pmf0295	Skimmin		Phenylpropanoids	137940	128490	102460	9	9	9	1.21126	7.31926e-05	-13.7379	down
pme1793	Pelargonin	Flavonoids	Anthocyanins	66021	97387	66800	893560	410470	621350	1.17515	8.36365	3.06413	up
pmf0506	Ligustilide		Others	9	9	9	551160	774300	631950	1.21125	72496.7	16.1456	up
pmb2791	9-HpOTrE		Lipids	42297	35168	41840	9	9	9	1.21123	0.000226311	-12.1094	down
pme1181	Deoxyguanosine		Nucleotide and derivates	9	9	9	499030	360180	415960	1.21118	47228.5	15.5274	up
pmb2723	4-hydroxycoumarin di-glucoside		Phenylpropanoids	9	9	9	41300	32687	33276	1.21115	3972.7	11.9559	up
pmf0404	Ethyl cinnamate		Phenylpropanoids	9	9	9	300280	202340	259210	1.21105	28215.9	14.7842	up
pmf0614	Peonidin 3, 5-diglucoside chloride	Flavonoids	Anthocyanins	1428700	1538800	1698700	4218800	3452000	5623700	1.16335	2.84911	1.51051	up
pmb0859	LysoPC 18:1 (2n isomer)		Lipids	22147000	22475000	22365000	71725000	75609000	74132000	1.21103	3.3061	1.72513	up
pmf0595	Aurantio-obtusin		Quinones	43787	30889	32296	9	9	9	1.21098	0.000252402	-11.952	down
pmb1574	Octadecadien-6-ynoic acid		Lipids	9	9	9	951360	530410	690200	1.21079	80443.3	16.2957	up
pme3256	Delphinidin 3-O-rutinoside (Tulipanin)	Flavonoids	Anthocyanins	1830000	1775100	1390100	98840	226460	336200	1.14351	0.132427	-2.91673	down
pmb0160	MAG (18:3) isomer5		Lipids	9	9	9	134360	78090	100220	1.21064	11580.4	13.4994	up
pmb0882	LysoPC 18:1		Lipids	11365000	10449000	11600000	54099000	56866000	58090000	1.21029	5.05941	2.33897	up
pmc0960	LysoPC 20:4		Lipids	13056000	12711000	12854000	38545000	40962000	42205000	1.21013	3.15145	1.65601	up
pme1458	Resveratrol		Phenylpropanoids	9	9	9	177090	181270	368730	1.21013	26929.3	14.7169	up
pme2555	Adenosine 5'-monophosphate		Nucleotide and derivates	12889000	12781000	12888000	2662600	2997900	2854200	1.21002	0.220828	-2.179	down
pmf0566	4-phenyldiazenylbenzene-1,3-diamine,hydrochloride		Alkaloids	37094	38312	67264	9	9	9	1.20997	0.000189248	-12.3674	down
pme2706	2,3-Dihydroxybenzoic acid		Organic acids and derivatives	261080	301360	293790	1999800	2087500	2209000	1.20979	7.35351	2.87843	up
pme3609	Cyanidin	Flavonoids	Anthocyanins	3147800	2378700	2367500	1158100	490740	611440	1.11858	0.286329	-1.80426	down
pme3198	2,4-Dihydroxybenzoic acid		Organic acids and derivatives	183090	175320	191920	1076700	1169900	1265600	1.20965	6.38199	2.67401	up
pme0286	2-Hydroxyisocaproic acid		Organic acids and derivatives	143910	126250	141750	1257700	1194900	1087800	1.20959	8.59508	3.10351	up
pmf0108	Garbanzol	Flavonoids	Flavanone	9	9	9	740960	530540	1018600	1.21075	84818.5	16.3721	up
pme0377	Naringenin	Flavonoids	Flavanone	1536400	1625300	1601300	9732300	8626100	10717000	1.20828	6.10443	2.60986	up
pme2563	γ-Glu-Cys		Amino acid and derivatives	9	9	9	28250	15651	32661	1.20941	2835.63	11.4695	up
pmb0852	LysoPC 18:2		Lipids	6488400	7065100	6613000	17217000	17931000	17486000	1.20918	2.60997	1.38403	up
pme2960	Naringenin chalcone	Flavonoids	Flavanone	1459300	1512500	1489500	11317000	8745200	11763000	1.20581	7.13362	2.83463	up
pmb3121	LysoPE 18:1		Lipids	954420	906320	978660	2677100	2636800	2885900	1.20889	2.88786	1.53	up
pmf0058	4',5,7-Trihydroxyflavanone	Flavonoids	Flavanone	454890	463860	498990	3687700	2857200	3920900	1.20528	7.38203	2.88402	up
pmd0130	LysoPC 14:0 (2n isomer)		Lipids	955630	1069300	1032600	2863300	2856600	2962800	1.20865	2.83978	1.50578	up
pmb0854	LysoPC 18:3		Lipids	40337000	43877000	41327000	117010000	128810000	122570000	1.20849	2.93442	1.55308	up
pmb0165	LysoPC 16:1		Lipids	4076500	4042000	4364200	12021000	13484000	12917000	1.20847	3.07802	1.622	up
pme3083	2-(Formylamino)benzoic acid		Organic acids and derivatives	611950	576380	540150	3933600	3309800	3663000	1.20847	6.30982	2.6576	up
pmd0144	LysoPC 20:1 (2n isomer)		Lipids	998910	1009900	1169100	5079000	5664000	5285200	1.20844	5.04363	2.33446	up
pmf0280	D-Galacturonic acid		Organic acids and derivatives	2993400	3253700	3083200	1392200	1447000	1449400	1.20838	0.459642	-1.12142	down
pme0001	Hesperetin 7-O-neohesperidoside (Neohesperidin)	Flavonoids	Flavanone	9008600	8914400	10159000	1663800	2123300	2658700	1.1893	0.229535	-2.12321	down
pme2129	(S)-(-)-2-Hydroxyisocaproic acid		Organic acids and derivatives	1157100	1070300	1107200	10308000	8540900	8243700	1.20831	8.12469	3.02231	up
pme3235	Liquiritigenin	Flavonoids	Flavanone	437830	420530	485520	1302100	1030600	1402100	1.18791	2.77912	1.47463	up
pme1436	p-Coumaric acid		Phenylpropanoids	6333100	5498900	5969300	41387000	34532000	37421000	1.20824	6.36695	2.6706	up
pmb3132	LysoPE 18:1 (2n isomer)		Lipids	1180500	1118000	1236100	3438300	3230900	3563100	1.2081	2.8949	1.53351	up
pmb0866	LysoPC 14:0		Lipids	800210	803480	794160	2115500	2369400	2423500	1.20775	2.88108	1.52661	up
pme1814	2,5-dihydroxybenzoic acid (Gentisic acid)		Organic acids and derivatives	1042900	1103900	1226100	6083300	6832500	7380600	1.20771	6.01749	2.58916	up
pmd0136	LysoPC 18:0		Lipids	103900000	110220000	121870000	367080000	391920000	384860000	1.20766	3.40445	1.76742	up
pme0258	Uracil		Nucleotide and derivates	12000000	11201000	12458000	28764000	26989000	27499000	1.20716	2.33467	1.22322	up
pme3705	D-glucoronic acid		Others	6280800	6188500	5852700	2818900	2747400	2988300	1.20707	0.466903	-1.0988	down
pme2596	4-Pyridoxic acid		Alkaloids	1498700	1404400	1566000	3046100	3140200	3085800	1.20697	2.07471	1.05291	up
pme0330	Naringenin 7-O-neohesperidoside (Naringin)	Flavonoids	Flavanone	647830	726110	870580	3866500	4575000	2835700	1.18688	5.02433	2.32893	up
pme2949	Hesperetin 7-rutinoside (Hesperidin)	Flavonoids	Flavanone	1743700	2061600	2308200	371180	502610	576870	1.18427	0.237288	-2.07529	down
pmb3075	3-O-p-Coumaroyl shikimic acid		Organic acids and derivatives	80198	73259	72954	32462	29920	31578	1.2068	0.414998	-1.26883	down
pme3217	Isoliquiritigenin	Flavonoids	Flavanone	195750	196570	225430	803490	514810	908230	1.16539	3.60426	1.8497	up
pme3282	Afzelechin (3,5,7,4'-Tetrahydroxyflavan)	Flavonoids	Flavanone	348700	352860	433330	204020	198630	151250	1.15026	0.488065	-1.03486	down
pmd0132	LysoPC 16:0 (2n isomer)		Lipids	45448000	38695000	40346000	139120000	127360000	135500000	1.20611	3.22904	1.69111	up
pmb2406	LysoPC 17:0		Lipids	2887500	2807800	3218600	9871100	10579000	11605000	1.2061	3.59608	1.84643	up
pmd0160	LysoPE 16:0 (2n isomer)		Lipids	21312000	20088000	23026000	58214000	54369000	59390000	1.20607	2.66931	1.41647	up
pmc0304	Succinyladenosine		Nucleotide and derivates	384950	406370	370880	1274200	1178500	1395400	1.20606	3.31105	1.72729	up
pmb0693	C-hexosyl-apigenin C-pentoside	Flavonoids	Flavone	28915	59201	52441	9	9	9	1.20977	0.000192093	-12.3459	down
pmb3044	Tricin di-O-hexoside	Flavonoids	Flavone	401790	428750	438560	72668	73737	85745	1.20832	0.182925	-2.45068	down
pmb0873	LysoPC 18:2 (2n isomer)		Lipids	43998000	38062000	37590000	108030000	109100000	107980000	1.20517	2.71718	1.44211	up
pmf0269	Tryptophol		Alkaloids	76078	79342	62836	619710	661320	510860	1.20495	8.21004	3.03739	up
pme0379	Apigenin	Flavonoids	Flavone	615850	549630	535810	3276100	2863700	3518300	1.20694	5.67693	2.50511	up
pmb3117	LysoPE 16:0		Lipids	19390000	17040000	20282000	50852000	49784000	51902000	1.20484	2.6897	1.42744	up
pmd0158	LysoPE 14:0 (2n isomer)		Lipids	46273	46228	51204	110310	123880	122360	1.20466	2.48112	1.31099	up
pme2801	7-Methylxanthine		Nucleotide and derivates	93408	85651	88710	177310	197100	183230	1.20444	2.08254	1.05835	up
pme3337	N6-Succinyl Adenosine		Nucleotide and derivates	406730	428800	477740	1111900	1056000	1116800	1.20443	2.50116	1.3226	up
pma0675	o-Anisic acid		Organic acids and derivatives	475500	473210	444180	56886	57581	78631	1.20418	0.138631	-2.85068	down
pme3473	Butin	Flavonoids	Flavone	567550	531400	537390	4435600	3457200	4446700	1.20694	7.54091	2.91474	up
pme2457	Luteolin 7-O-glucoside (Cynaroside)	Flavonoids	Flavone	198570	245600	220210	2196000	1952000	1728000	1.2068	8.84434	3.14475	up
pmf0403	L-Hyoscyamine		Alkaloids	84507000	84099000	82415000	31949000	36760000	37114000	1.20346	0.42157	-1.24615	down
pmb0645	6-C-hexosyl-hesperetin O-hexoside	Flavonoids	Flavone	1925900	2062400	2064500	854240	942620	892930	1.20631	0.444388	-1.17011	down
pmf0057	4,2',4',6'-Tetrahydroxychalcone	Flavonoids	Flavone	477970	522510	547650	4162000	3191700	4369100	1.20486	7.57223	2.92072	up
pmf0138	D-(+)-Mannose		Carbohydrates	260090	336350	351720	1884100	1935900	2285800	1.20308	6.43963	2.68698	up
pmb0501	Agmatine		Phenolamides	756330	749110	666630	220160	209810	176850	1.20299	0.279374	-1.83973	down
pma6371	di-C,C-hexosyl-luteolin	Flavonoids	Flavone	3720500	4044600	4355100	757870	955050	917340	1.20366	0.217015	-2.20414	down
pmb2948	Adenosine 3'-monophosphate		Nucleotide and derivates	5168500	4974600	4534700	1056200	1207900	1372800	1.20246	0.247782	-2.01285	down
pmb0749	O-Feruloyl quinic acid		Organic acids and derivatives	167030	206730	175190	59974	63223	63235	1.20238	0.339616	-1.55803	down
pmb2388	LysoPC 18:0 (2n isomer)		Lipids	117940	117520	106340	425910	451860	558250	1.2022	4.20135	2.07085	up
pma6353	Chrysin C-hexoside	Flavonoids	Flavone	1465600	1168000	1340200	6505400	5275900	5827000	1.20275	4.4311	2.14766	up
pmb0569	Syringetin 5-O-hexoside	Flavonoids	Flavone	493570	503850	424770	201050	199260	190670	1.20214	0.415542	-1.26693	down
pmb0622	C-hexosyl-luteolin O-hexoside	Flavonoids	Flavone	4066400	4883600	5214800	872810	992350	1162200	1.19856	0.213724	-2.22618	down
pme0263	5-Methyluridine		Nucleotide and derivates	150180	166520	137280	407600	379790	393180	1.20159	2.60049	1.37878	up
pmf0196	Phosphoenolpyruvic acid		Organic acids and derivatives	139490	136490	122820	66944	64099	60506	1.20132	0.480313	-1.05795	down
pme1378	1-Methyladenosine		Nucleotide and derivates	21098	31681	22848	234290	199620	195610	1.20105	8.32401	3.05728	up
pmf0271	(E)-p-coumaric acid		Phenylpropanoids	1041100	1001800	831460	5545300	4272000	5377500	1.20092	5.28632	2.40227	up
pme1408	L-Glutamine		Amino acid and derivatives	230170	217930	245050	59405	46906	62186	1.20085	0.243089	-2.04044	down
pme0191	N-Glycyl-L-leucine		Amino acid and derivatives	756970	715570	858920	81988	76928	117070	1.20065	0.118375	-3.07857	down
pmb0855	LysoPC 16:0		Lipids	1207300	1076400	1215300	3470900	4445200	3770400	1.20056	3.33995	1.73983	up
pmb1754	O-Phosphocholine		Alkaloids	16440000	15762000	12617000	3747000	3238000	3884100	1.20014	0.242511	-2.04388	down
pme3011	γ-aminobutyric acid		Organic acids and derivatives	1216200	1135500	1072900	428200	368760	451870	1.19993	0.364664	-1.45536	down
pme1952	Riboflavin		Vitamins and derivatives	4969200	5726200	5697600	1689800	1405400	1778600	1.19967	0.29731	-1.74996	down
pme1510	Baicalein (5,6,7-Trihydroxyflavone)	Flavonoids	Flavone	47259	37482	33773	237740	178390	249830	1.19446	5.61925	2.49038	up
pme2693	N-Acetylputrescine		Phenolamides	669390	619540	680940	228780	216600	176910	1.1991	0.315904	-1.66244	down
pme3827	3,4-Dihydroxy-DL-phenylalanine		Amino acid and derivatives	403380	399390	351120	844360	776940	853790	1.19908	2.145	1.10098	up
pme1709	Nicotinic Acid Methyl Ester (Methyl Nicotinate)		Vitamins and derivatives	264020	226860	265170	63204	47742	45371	1.19895	0.206755	-2.27401	down
pme2743	N-Phenylacetylglycine		Amino acid and derivatives	36964	46959	36877	586630	439600	346120	1.19866	11.3605	3.50596	up
pme0359	Apigenin 5-O-glucoside	Flavonoids	Flavone	3582400	4345600	3482400	10880000	9584900	9275400	1.19207	2.60642	1.38207	up
pme0333	Apigenin 7-O-neohesperidoside (Rhoifolin)	Flavonoids	Flavone	2119300	1763200	1904500	190450	80832	92763	1.19035	0.0629074	-3.99063	down
pme1988	L-Alanine		Amino acid and derivatives	946880	901070	905920	2683100	2491200	2120500	1.1982	2.64893	1.40541	up
pme0499	D-Sorbitol		Alcohols	730410	743920	564590	4659600	3374900	3785700	1.19769	5.79728	2.53538	up
pme0496	Nicotinic acid		Vitamins and derivatives	428490	368530	363950	1003200	921920	868630	1.19717	2.40639	1.26687	up
pme2430	N-Acetyl-L-tyrosine		Amino acid and derivatives	114040	90106	90119	1206900	1115300	719780	1.19689	10.3376	3.36982	up
pme3194	N-acetylglycine		Amino acid and derivatives	116650000	126340000	92114000	28292000	31552000	31990000	1.19681	0.274046	-1.86751	down
pmf0290	2-Hydroxypyridine		Alkaloids	3380100	3847600	3125900	1493500	1285400	1337000	1.19629	0.397533	-1.33085	down
pme1683	D-Pantothenic dcid		Organic acids and derivatives	5879700	5972600	6384500	2681000	3209500	2773000	1.19522	0.475056	-1.07383	down
pme2277	3-Aminosalicylic acid		Organic acids and derivatives	69170	88212	94328	282440	336970	344480	1.19512	3.82937	1.93711	up
pmb2969	Hesperetin C-hexoside O-hexoside	Flavonoids	Flavone	125400	134720	111610	46315	53338	58461	1.18721	0.425346	-1.23329	down
pmb3006	Apigenin 7-O-glucoside (Cosmosiin)	Flavonoids	Flavone	5130800	7225300	6405600	18248000	16924000	16320000	1.18585	2.74453	1.45656	up
pmb0764	4-Methyl-5-thiazoleethanol		Alcohols	2189900	1762100	1788500	5392800	6832300	6774500	1.19363	3.30975	1.72672	up
pme0240	Benzoic acid		Organic acids and derivatives	501530	526760	662210	1862600	2069900	2468700	1.19341	3.78657	1.92089	up
pmb0696	8-C-hexosyl chrysoeriol O-hexoside	Flavonoids	Flavone	247850	253390	222380	1108700	1603300	908770	1.18384	5.00369	2.32299	up
pmb3042	Tricin 5-O-hexoside	Flavonoids	Flavone	2437700	2979900	3352700	6909900	8203800	8554200	1.18187	2.69864	1.43223	up
pma6496	Luteolin 6-C-glucoside	Flavonoids	Flavone	961820	782370	771430	402890	319470	399780	1.17331	0.446069	-1.16466	down
pme1218	2-Picolinic acid		Organic acids and derivatives	2117200	1549800	1696700	5802300	5001200	5574700	1.19159	3.05353	1.61048	up
pmf0005	Narirutin	Flavonoids	Flavone	368830	401930	567950	2136300	2715400	1516400	1.16799	4.75689	2.25002	up
pme2786	N-Acetyl-5-hydroxytryptamine		Alkaloids	1612900	1504600	1721800	582070	550030	714720	1.19105	0.38163	-1.38976	down
pmb2850	Tricin	Flavonoids	Flavone	18187	15280	19318	9130.6	8822.9	7193.1	1.16739	0.476397	-1.06976	down
pmb3043	Tricin 5-O-rutinoside	Flavonoids	Flavone	1506900	1254200	1454700	270900	419640	486820	1.16441	0.279273	-1.84025	down
pmb0653	di-C,C-hexosyl-apigenin	Flavonoids	Flavone	298390	193280	370890	77302	100750	69735	1.1383	0.287269	-1.79952	down
pme0170	Nα-Acetyl-L-arginine		Amino acid and derivatives	2028900	1707600	1718700	8208500	8190400	5701100	1.18921	4.05118	2.01834	up
pme1828	Betaine		Alkaloids	61062000	81886000	53468000	18155000	18133000	17127000	1.18919	0.271948	-1.8786	down
pmb0202	Xanthine		Nucleotide and derivates	1561900	1557400	1757900	7103600	5025700	5038100	1.18872	3.51993	1.81555	up
pme0025	L-Kynurenine		Amino acid and derivatives	395940	341320	420440	1251800	1428400	1022100	1.18831	3.19798	1.67716	up
pma0948	Hydroxyphenethylamine		Others	186050	209730	196100	458550	376320	467860	1.18809	2.201	1.13816	up
pmb3002	Chrysoeriol 7-O-rutinoside	Flavonoids	Flavone	938210	1016300	1077000	241610	369900	512550	1.11281	0.370792	-1.43132	down
pmb3079	N-Acetylglucosamine 1-phosphate		Others	1241900	1334200	1099900	457450	325930	335820	1.1879	0.304461	-1.71567	down
pme0374	Isovitexin	Flavonoids	Flavone	28828	49721	49549	137580	118000	81595	1.08786	2.63216	1.39625	up
pme2993	Scopoletin (7-Hydroxy-5-methoxycoumarin)		Phenylpropanoids	160790	233810	161350	666660	631650	643810	1.18765	3.49334	1.80461	up
pme0076	N-Acetyl-L-glutamic acid		Amino acid and derivatives	5375300	4941000	4170200	2008600	1805400	1584600	1.18747	0.372664	-1.42405	down
pmb0602	Syringetin 7-O-hexoside	Flavonoids	Flavone	561620	524920	578580	161570	67738	229080	1.07619	0.275288	-1.86098	down
pmb0689	Chrysoeriol C-hexoside	Flavonoids	Flavone	596310	682570	861070	241530	432030	384340	1.04851	0.494357	-1.01637	down
pmf0383	5,7-Dihydroxy-3',4',5'-trimethoxyflavone	Flavonoids	Flavonoid	466880	459840	430260	9	9	9	1.21141	1.98971e-05	-15.6171	down
pmb2228	LysoPC 19:0		Lipids	141210	147970	136680	441960	320420	434430	1.18535	2.81034	1.49074	up
pmb2778	9,10-EODE		Lipids	9472.3	5867.9	9063	129420	62527	97311	1.18491	11.8533	3.56721	up
pmf0301	Engeletin	Flavonoids	Flavonoid	601040	614090	593430	1682700	1531200	1576300	1.20893	2.64863	1.40524	up
pmf0583	Phloridzin	Flavonoids	Flavonoid	3480700	4183700	3534000	1423500	1387500	1117700	1.19199	0.350827	-1.51117	down
pmf0372	Pedalitin	Flavonoids	Flavonoid	875460	974270	764150	234510	172940	250280	1.19	0.25163	-1.99063	down
pmf0521	Morin	Flavonoids	Flavonoid	121400	88808	116930	259010	251760	330960	1.16823	2.57301	1.36346	up
pma0149	Sinapoyl malate		Organic acids and derivatives	263800	257370	233800	101310	92586	124490	1.18358	0.42172	-1.24564	down
pmf0052	Sophoridine		Alkaloids	464740	487460	456230	52600	93270	95614	1.18305	0.171456	-2.54409	down
pme0066	Guanidineacetic acid		Amino acid and derivatives	987700	963640	965660	1912200	2624900	2453600	1.18281	2.39654	1.26095	up
pme0123	Glycyl-L-proline		Amino acid and derivatives	62842	73165	81652	36879	35265	35620	1.18239	0.495105	-1.01419	down
pmf0179	Narcissoside	Flavonoids	Flavonoid	92878	129320	129180	56707	54329	53060	1.16082	0.467007	-1.09848	down
pmf0549	Diosmin	Flavonoids	Flavonoid	4566000	4927200	6197200	1833700	2327700	2459100	1.15951	0.421946	-1.24487	down
pmb2789	13-HpOTrE(r)		Lipids	18290	21648	26146	62065	53326	61149	1.18107	2.67145	1.41762	up
pme0085	Rosmarinic acid		Organic acids and derivatives	71076	78358	84108	29617	28065	37729	1.18026	0.408539	-1.29145	down
pmf0348	2,6-Dimethyl-7-octene-2,3,6-triol		Alcohols	215880	178170	214500	2686300	1355300	1301300	1.1802	8.77972	3.13418	up
pmf0267	Indole-3-carboxylic		Alkaloids	219550	242260	213800	590990	627300	457540	1.17973	2.48047	1.31061	up
pme1846	D(+)-Glucose		Carbohydrates	148590	262920	270740	1123600	1321400	1422400	1.17972	5.6686	2.50299	up
pme3351	Allysine(6-Oxo DL-Norleucine)		Amino acid and derivatives	159250	185540	136250	70016	67276	57147	1.17885	0.404205	-1.30684	down
pme0542	Indole-2-carboxylic acid		Indole derivatives	90622	81371	57452	255850	264930	321670	1.17852	3.67169	1.87644	up
pmb0889	Punicic acid		Lipids	12261000	6537400	9938300	111510000	59088000	82885000	1.17819	8.82088	3.14092	up
pme2237	Dulcitol		Alcohols	1276900	1180800	842530	6440300	4112900	4968700	1.17814	4.70328	2.23367	up
pmf0208	Isoquercitroside	Flavonoids	Flavonoid	676340	1196600	1413800	186250	282750	234670	1.1474	0.214094	-2.22369	down
pmf0319	Acetosyringone		Phenylpropanoids	87629	79630	84727	162560	205240	229150	1.17708	2.36898	1.24427	up
pmf0526	Isoimperatorin		Phenylpropanoids	12640	18988	22095	65703	70844	70124	1.17706	3.84697	1.94372	up
pmb0962	Lysine butyrate		Amino acid and derivatives	4593900	3608800	1054700	62867	69162	63183	1.17679	0.0210871	-5.56749	down
pme2253	L-Gulonic-γ-lactone		Others	73598	75162	132300	541220	425390	457090	1.17666	5.06547	2.3407	up
pmf0204	Hyperoside	Flavonoids	Flavonoid	1958900	2711300	1573500	226810	137160	432730	1.14611	0.127601	-2.97029	down
pmb2804	13-HPODE		Lipids	37757	13722	14707	375090	255150	339180	1.1754	14.6469	3.87252	up
pmf0246	Orientin	Flavonoids	Flavonoid	33146	40200	25900	7996.2	10949	14909	1.12352	0.341114	-1.55167	down
pma1840	Coumaroyl choline		Alkaloids	80157	94401	159690	669400	581650	881190	1.17447	6.37922	2.67338	up
pma1839	N-sinapoyl cadaverine		Phenolamides	376500	322520	312050	101860	136870	144460	1.17434	0.378995	-1.39975	down
pme1667	Isovitexin 7-O-glucoside (Saponarin)	Flavonoids	Flavonoid	79007	51431	132670	190830	170880	201980	1.01017	2.14243	1.09925	up
pmf0286	Phytol		Terpene	2679900	1435900	2223200	31936000	14115000	20825000	1.17328	10.5499	3.39916	up
pmf0359	Skimmine		Phenylpropanoids	410160	543290	405810	1096000	1129500	951140	1.17278	2.33704	1.22468	up
pmf0481	Dehydrocorydaline		Alkaloids	26388	28105	27045	49605	67741	67839	1.17275	2.27115	1.18342	up
pme2019	DL-Arabinose		Carbohydrates	383860	388240	535560	1025100	1167100	1327400	1.17218	2.69153	1.42842	up
pme0250	Azelaic acid		Organic acids and derivatives	2242000	2100600	2522700	28038000	12801000	13133000	1.17098	7.86156	2.97482	up
pmf0557	Acid orange 20		Alkaloids	734130	542260	705820	2607000	1722000	2017800	1.17082	3.20188	1.67892	up
pme0543	Indole-5-carboxylic acid		Indole derivatives	229810	193050	243020	610880	681210	467650	1.16905	2.64273	1.40203	up
pmb0883	LysoPE 18:0		Lipids	245880	245130	184870	580790	690070	505620	1.16869	2.6284	1.39418	up
pme3290	3,7-Di-O-methylquercetin	Flavonoids	Flavonol	82453	70387	84724	9	9	9	1.21125	0.000113654	-13.1031	down
pmb2653	D(+)-Melezitose O-rhamnoside		Carbohydrates	106880	125440	108670	30082	43761	24775	1.16809	0.289211	-1.78981	down
pme3267	Kaempferol 3-O-galactoside (Trifolin)	Flavonoids	Flavonol	334660	402860	403900	3599500	3184400	3472300	1.20879	8.98547	3.16759	up
pmf0297	1-Eicosanol		Lipids	1529800	1310300	1645000	4918300	3342000	3693600	1.16782	2.66525	1.41427	up
pme2493	Kaempferol 3,7-dirhamnoside (Kaempferitrin)	Flavonoids	Flavonol	10512000	9171500	7977100	747980	921020	1086300	1.20327	0.099611	-3.32755	down
pme1622	Kaempferol 3-O-glucoside (Astragalin)	Flavonoids	Flavonol	653440	748580	752830	1427100	1584600	1502000	1.19841	2.09467	1.06672	up
pma0461	14,15-Dehydrocrepenynic acid		Lipids	3423200	2473100	2652200	9711800	6691000	8152500	1.16697	2.87247	1.52229	up
pme0196	Kaempferol	Flavonoids	Flavonol	18909	24835	19677	68768	60034	72911	1.19242	3.18054	1.66927	up
pme0195	L-Cysteine		Amino acid and derivatives	192550	188720	200990	84382	80317	54129	1.16562	0.375825	-1.41187	down
pme2898	Dihydromyricetin	Flavonoids	Flavonol	116630	233650	228980	1571900	1462600	1638600	1.18417	8.06736	3.0121	up
pmb3894	Di-O-methylquercetin	Flavonoids	Flavonol	1059300	396030	659900	15617000	6516200	10450000	1.16761	15.4041	3.94524	up
pme2954	Quercetin	Flavonoids	Flavonol	70724	50448	41554	147740	187520	179100	1.16214	3.1609	1.66033	up
pmb0711	Quercetin 7-O-rutinoside	Flavonoids	Flavonol	1018000	996320	2681100	109810	172450	125760	1.15878	0.0868974	-3.52454	down
pmb0952	Thiamine		Vitamins and derivatives	577270	495160	481980	159920	98718	180720	1.16101	0.282653	-1.8229	down
pmb2940	1-O-beta-D-Glucopyranosyl sinapate		Phenylpropanoids	17223	17788	24602	44578	61369	50914	1.16094	2.63132	1.39579	up
pme3279	2'-Hydroxygenistein	Flavonoids	Isoflavone	9	9	9	824990	1392700	1013500	1.21104	119674	16.8687	up
pme1578	Genistein (4',5,7-Trihydroxyisoflavone)	Flavonoids	Isoflavone	802780	679550	714090	3986000	3223600	4117000	1.20392	5.15685	2.36649	up
pmb0800	Niacinamide		Vitamins and derivatives	998960	757460	1067300	2363100	1868200	2311200	1.1594	2.31698	1.21224	up
pme3233	Calycosin	Flavonoids	Isoflavone	1825000	1556000	1525400	4695900	5416800	5363800	1.20184	3.15435	1.65734	up
pme3252	Glycitein	Flavonoids	Isoflavone	1945200	1714900	1601100	5149400	5713300	6047600	1.20183	3.21415	1.68444	up
pmb0864	LysoPE 14:0		Lipids	30477	46273	46924	102220	98868	95793	1.15412	2.40051	1.26334	up
pmf0388	Dehydrovomifoliol		Alcohols	35183	19954	21170	72304	94148	81178	1.15244	3.24518	1.6983	up
pmf0336	Indole-3-carboxylic acid		Alkaloids	235500	228340	264090	632810	672490	439980	1.15213	2.39759	1.26159	up
pme3210	Genistein 7-O-Glucoside (Genistin)	Flavonoids	Isoflavone	3421400	3734400	4030300	7077900	8067100	7807400	1.1947	2.05187	1.03694	up
pme3208	Glycitin	Flavonoids	Isoflavone	2685900	2924500	3204800	7049300	7124800	5845200	1.18788	2.271	1.18333	up
pma3606	9-Hydroxy-(10E,12Z,15Z)-octadecatrienoic acid		Lipids	395720	324010	157040	1621200	3242500	4093700	1.14669	10.2164	3.35281	up
pme3400	Sissotrin	Flavonoids	Isoflavone	69565	92187	52842	455520	317450	645300	1.16649	6.60909	2.72445	up
pme2478	Protocatechuic aldehyde	Flavonoids	Polyphenol	9	9	9	348180	388970	361220	1.21139	40680.4	15.312	up
pme0166	1-Methylxanthine		Nucleotide and derivates	22147	22715	25122	58724	52331	38662	1.14329	2.1393	1.09714	up
pmb2787	9-KODE		Lipids	218420	153470	193760	844960	483500	507120	1.14016	3.24508	1.69825	up
pme1824	Protocatechuic acid	Flavonoids	Polyphenol	6808000	7104400	7135000	42923000	45729000	51271000	1.20958	6.64799	2.73292	up
pme0151	Dihydrouracil		Nucleotide and derivates	40115	25576	40030	101630	74829	100920	1.13697	2.62369	1.3916	up
pme1936	Creatinine		Organic acids and derivatives	4270000	2349700	2577200	1189300	1057500	1040000	1.13159	0.357381	-1.48446	down
pmb0885	4-oxo-9Z,11Z,13E,15E-octadecatetraenoic acid		Lipids	49612	37110	55141	7183.4	15379	13786	1.13114	0.256222	-1.96453	down
pme3163	D-Sedoheptuiose 7-phosphate		Carbohydrates	298580	319660	360280	120870	71918	42838	1.1241	0.240798	-2.0541	down
pme0460	L-Epicatechin	Flavonoids	Polyphenol	3444600	3842300	3770000	1165000	1313100	1452700	1.19952	0.355507	-1.49205	down
pmf0345	(-)-Epiafzelechin	Flavonoids	Polyphenol	2968500	3560400	2871700	6852100	8353400	6950900	1.18382	2.35691	1.2369	up
pme0024	2-Aminoethanesulfonic acid		Organic acids and derivatives	147640	120210	137920	509270	279500	301310	1.11807	2.68645	1.4257	up
pme2529	1,5-Anhydro-D-glucitol		Alcohols	19418	18478	7488.1	83731	56250	69393	1.11797	4.61338	2.20582	up
pmb2947	Catechin-catechin-catechin	Flavonoids	Polyphenol	290580	251000	505720	37261	36725	53560	1.17746	0.121786	-3.03759	down
pmf0591	Cinnamic acid		Phenylpropanoids	68058	28566	66391	196590	172430	233750	1.11218	3.69764	1.8866	up
pme1109	Guanine		Nucleotide and derivates	1022800	869310	1522400	2740500	2142700	2781100	1.10628	2.24463	1.16648	up
pmb2325	MAG (18:3) isomer2		Lipids	154250	105920	137650	682280	343580	320180	1.10222	3.38354	1.75853	up
pmb2857	L-Glutamic acid O-glucoside		Amino acid and derivatives	934370	805890	613450	2632900	1456200	1968900	1.10205	2.57381	1.36391	up
pma0692	N', N''-di-p-coumaroylspermidine		Phenolamides	356660	521400	400070	1034600	2973700	1687900	1.10124	4.45667	2.15597	up
pme3416	Esculetin (6,7-dihydroxycoumarin)		Phenylpropanoids	12226000	13475000	12453000	4484800	4509700	8081700	1.0963	0.44756	-1.15985	down
pmf0458	6-Gingerol	Flavonoids	Polyphenol	915450	501500	369980	11586000	5911500	10190000	1.17658	15.4945	3.95368	up
pme1137	6-hydroxynicotinic acid		Vitamins and derivatives	144110	74338	94054	254480	414870	232470	1.08538	2.88581	1.52897	up
pmb0287	MAG (18:4) isomer2		Lipids	223440	171250	128200	445200	837740	395630	1.08364	3.21018	1.68265	up
pme0247	trans-4-Hydroxy-L-proline		Amino acid and derivatives	48635	38231	51955	69127	115390	97697	1.08122	2.03293	1.02356	up
pme0432	Procyanidin A2	Flavonoids	Proanthocyanidins	553340	535800	764010	129110	153240	155520	1.19159	0.236284	-2.08141	down
pmf0066	2'-Acetylacteoside		Organic acids and derivatives	56234	41331	55755	16829	26228	8723.2	1.05121	0.337726	-1.56607	down
pmb3072	3-O-p-coumaroyl shikimic acid O-hexoside		Organic acids and derivatives	94393	98402	99572	48062	48028	20338	1.04978	0.398226	-1.32834	down
pme0434	Procyanidin B2	Flavonoids	Proanthocyanidins	13263000	12123000	14265000	2966900	3859800	4642900	1.18216	0.289264	-1.78954	down
pmb0464	Aspartic acid di-O-glucoside		Amino acid and derivatives	151640	164820	84571	336180	351640	228730	1.04131	2.28548	1.1925	up
pme0436	Procyanidin B3	Flavonoids	Proanthocyanidins	43616	43790	49683	6609.4	7320.9	14588	1.15666	0.208028	-2.26515	down
pma1303	LysoPC 16:2		Lipids	4761.7	9	9	23060	57771	48260	1.00697	27.0082	4.75532	up
