# Supplementary material for: Comparison of Phenolic and Flavonoid Compound Profiles and Antioxidant and α-Glucosidase Inhibition Properties of Cultivated Soybean (Glycine max) and Wild Soybean (Glycine soja)
Source: Plants (Basel). 2021 Apr 20;10(4):813. doi: 10.3390/plants10040813 (PMC8074397; doi:10.3390/plants10040813)
Supplement: Supplementary file 1 [file plants-10-00813-s001.zip › Table S3.xlsx]

## Sheet: KEGG annotation
Table S3. KEGG annotation results of differential flavonoid metabolites between soybean (Glycine max) and wild soybean (Glycine soja).
Index	Compounds	Class1	Class2	GZ1	GZ2	GZ3	GM1	GM2	GM3	VIP	Fold_Change	Log2FC	Type	cpd_ID	kegg_map	kegg_map_add
pme1773	Cyanidin 3-O-rutinoside (Keracyanin)	Flavonoids	Anthocyanins	35236000	31270000	32314000	2362400	2684100	2875300	1.20952	0.0801639	-3.6409	down	C08620	ko00942	ko00942
pme1793	Pelargonin	Flavonoids	Anthocyanins	66021	97387	66800	893560	410470	621350	1.17515	8.36365	3.06413	up	C08725	ko00942	ko00942
pme3256	Delphinidin 3-O-rutinoside (Tulipanin)	Flavonoids	Anthocyanins	1830000	1775100	1390100	98840	226460	336200	1.14351	0.132427	-2.91673	down	C16315	ko00942	ko00942
pme3609	Cyanidin	Flavonoids	Anthocyanins	3147800	2378700	2367500	1158100	490740	611440	1.11858	0.286329	-1.80426	down	C05905	ko00941,ko00942,ko01061,ko01110	ko00941,ko00942,ko01061,ko01110
pmf0263	Apigeninidin chloride	Flavonoids	Anthocyanins	79635	88977	82897	355120	335750	280990	1.20309	3.86412	1.95014	up	--	--	--
pmf0614	Peonidin 3, 5-diglucoside chloride	Flavonoids	Anthocyanins	1428700	1538800	1698700	4218800	3452000	5623700	1.16335	2.84911	1.51051	up	--	--	--
pme0001	Hesperetin 7-O-neohesperidoside (Neohesperidin)	Flavonoids	Flavanone	9008600	8914400	10159000	1663800	2123300	2658700	1.1893	0.229535	-2.12321	down	C09806	ko00941	ko00941
pme0330	Naringenin 7-O-neohesperidoside (Naringin)	Flavonoids	Flavanone	647830	726110	870580	3866500	4575000	2835700	1.18688	5.02433	2.32893	up	C09789	ko00941	ko00941
pme0377	Naringenin	Flavonoids	Flavanone	1536400	1625300	1601300	9732300	8626100	10717000	1.20828	6.10443	2.60986	up	C00509	ko00941,ko00943,ko01061,ko01100,ko01110	ko00941,ko00943,ko01061,ko01100,ko01110
pme2949	Hesperetin 7-rutinoside (Hesperidin)	Flavonoids	Flavanone	1743700	2061600	2308200	371180	502610	576870	1.18427	0.237288	-2.07529	down	C09755	--	--
pme2960	Naringenin chalcone	Flavonoids	Flavanone	1459300	1512500	1489500	11317000	8745200	11763000	1.20581	7.13362	2.83463	up	C06561	ko00941,ko01061,ko01100,ko01110	ko00941,ko01061,ko01100,ko01110
pme3217	Isoliquiritigenin	Flavonoids	Flavanone	195750	196570	225430	803490	514810	908230	1.16539	3.60426	1.8497	up	C08650	ko00941,ko01061,ko01110	ko00941,ko01061,ko01110
pme3235	Liquiritigenin	Flavonoids	Flavanone	437830	420530	485520	1302100	1030600	1402100	1.18791	2.77912	1.47463	up	C09762	ko00941,ko00943,ko01061,ko01110	ko00941,ko00943,ko01061,ko01110
pme3282	Afzelechin (3,5,7,4'-Tetrahydroxyflavan)	Flavonoids	Flavanone	348700	352860	433330	204020	198630	151250	1.15026	0.488065	-1.03486	down	C09320	ko00941,ko01110	ko00941,ko01110
pmf0058	4',5,7-Trihydroxyflavanone	Flavonoids	Flavanone	454890	463860	498990	3687700	2857200	3920900	1.20528	7.38203	2.88402	up	C00509	ko00941,ko00943,ko01061,ko01100,ko01110	ko00941,ko00943,ko01061,ko01100,ko01110
pmf0108	Garbanzol	Flavonoids	Flavanone	9	9	9	740960	530540	1018600	1.21075	84818.5	16.3721	up	C09751	ko00941	ko00941
pma6353	Chrysin C-hexoside	Flavonoids	Flavone	1465600	1168000	1340200	6505400	5275900	5827000	1.20275	4.4311	2.14766	up	--	--	ko01120
pma6371	di-C,C-hexosyl-luteolin	Flavonoids	Flavone	3720500	4044600	4355100	757870	955050	917340	1.20366	0.217015	-2.20414	down	--	--	ko00941,ko00944,ko01100,ko01110
pma6496	Luteolin 6-C-glucoside	Flavonoids	Flavone	961820	782370	771430	402890	319470	399780	1.17331	0.446069	-1.16466	down	--	--	ko00941,ko00944,ko01100,ko01110
pmb0569	Syringetin 5-O-hexoside	Flavonoids	Flavone	493570	503850	424770	201050	199260	190670	1.20214	0.415542	-1.26693	down	--	--	ko00944
pmb0602	Syringetin 7-O-hexoside	Flavonoids	Flavone	561620	524920	578580	161570	67738	229080	1.07619	0.275288	-1.86098	down	--	--	ko00944
pmb0622	C-hexosyl-luteolin O-hexoside	Flavonoids	Flavone	4066400	4883600	5214800	872810	992350	1162200	1.19856	0.213724	-2.22618	down	--	--	ko00941,ko00944,ko01100,ko01110
pmb0645	6-C-hexosyl-hesperetin O-hexoside	Flavonoids	Flavone	1925900	2062400	2064500	854240	942620	892930	1.20631	0.444388	-1.17011	down	--	--	--
pmb0653	di-C,C-hexosyl-apigenin	Flavonoids	Flavone	298390	193280	370890	77302	100750	69735	1.1383	0.287269	-1.79952	down	--	--	ko00941,ko00943,ko00944,ko01100,ko01110
pmb0689	Chrysoeriol C-hexoside	Flavonoids	Flavone	596310	682570	861070	241530	432030	384340	1.04851	0.494357	-1.01637	down	--	--	ko00944
pmb0693	C-hexosyl-apigenin C-pentoside	Flavonoids	Flavone	28915	59201	52441	9	9	9	1.20977	0.000192093	-12.3459	down	--	--	ko00941,ko00943,ko00944,ko01100,ko01110
pmb0696	8-C-hexosyl chrysoeriol O-hexoside	Flavonoids	Flavone	247850	253390	222380	1108700	1603300	908770	1.18384	5.00369	2.32299	up	--	--	ko00944
pmb2850	Tricin	Flavonoids	Flavone	18187	15280	19318	9130.6	8822.9	7193.1	1.16739	0.476397	-1.06976	down	--	--	ko00944
pmb2969	Hesperetin C-hexoside O-hexoside	Flavonoids	Flavone	125400	134720	111610	46315	53338	58461	1.18721	0.425346	-1.23329	down	--	--	ko00941
pmb3002	Chrysoeriol 7-O-rutinoside	Flavonoids	Flavone	938210	1016300	1077000	241610	369900	512550	1.11281	0.370792	-1.43132	down	--	--	ko00944
pmb3006	Apigenin 7-O-glucoside (Cosmosiin)	Flavonoids	Flavone	5130800	7225300	6405600	18248000	16924000	16320000	1.18585	2.74453	1.45656	up	C04608	ko00944	ko00944
pmb3042	Tricin 5-O-hexoside	Flavonoids	Flavone	2437700	2979900	3352700	6909900	8203800	8554200	1.18187	2.69864	1.43223	up	--	--	ko00944
pmb3043	Tricin 5-O-rutinoside	Flavonoids	Flavone	1506900	1254200	1454700	270900	419640	486820	1.16441	0.279273	-1.84025	down	--	--	ko00944
pmb3044	Tricin di-O-hexoside	Flavonoids	Flavone	401790	428750	438560	72668	73737	85745	1.20832	0.182925	-2.45068	down	--	--	ko00944
pme0333	Apigenin 7-O-neohesperidoside (Rhoifolin)	Flavonoids	Flavone	2119300	1763200	1904500	190450	80832	92763	1.19035	0.0629074	-3.99063	down	C12627	ko00944	ko00944
pme0359	Apigenin 5-O-glucoside	Flavonoids	Flavone	3582400	4345600	3482400	10880000	9584900	9275400	1.19207	2.60642	1.38207	up	--	--	ko00941,ko00943,ko00944,ko01100,ko01110
pme0374	Isovitexin	Flavonoids	Flavone	28828	49721	49549	137580	118000	81595	1.08786	2.63216	1.39625	up	C01714	ko00944	ko00944
pme0379	Apigenin	Flavonoids	Flavone	615850	549630	535810	3276100	2863700	3518300	1.20694	5.67693	2.50511	up	C01477	ko00941,ko00943,ko00944,ko01061,ko01100,ko01110	ko00941,ko00943,ko00944,ko01061,ko01100,ko01110
pme1510	Baicalein (5,6,7-Trihydroxyflavone)	Flavonoids	Flavone	47259	37482	33773	237740	178390	249830	1.19446	5.61925	2.49038	up	C10023	--	--
pme2457	Luteolin 7-O-glucoside (Cynaroside)	Flavonoids	Flavone	198570	245600	220210	2196000	1952000	1728000	1.2068	8.84434	3.14475	up	--	--	--
pme3473	Butin	Flavonoids	Flavone	567550	531400	537390	4435600	3457200	4446700	1.20694	7.54091	2.91474	up	C09614	ko00941	ko00941
pmf0005	Narirutin	Flavonoids	Flavone	368830	401930	567950	2136300	2715400	1516400	1.16799	4.75689	2.25002	up	C09793	--	--
pmf0057	4,2',4',6'-Tetrahydroxychalcone	Flavonoids	Flavone	477970	522510	547650	4162000	3191700	4369100	1.20486	7.57223	2.92072	up	C06561	ko00941,ko01061,ko01100,ko01110	ko00941,ko01061,ko01100,ko01110
pme1667	Isovitexin 7-O-glucoside (Saponarin)	Flavonoids	Flavonoid	79007	51431	132670	190830	170880	201980	1.01017	2.14243	1.09925	up	C08064	--	--
pmf0179	Narcissoside	Flavonoids	Flavonoid	92878	129320	129180	56707	54329	53060	1.16082	0.467007	-1.09848	down	--	--	--
pmf0204	Hyperoside	Flavonoids	Flavonoid	1958900	2711300	1573500	226810	137160	432730	1.14611	0.127601	-2.97029	down	--	--	--
pmf0208	Isoquercitroside	Flavonoids	Flavonoid	676340	1196600	1413800	186250	282750	234670	1.1474	0.214094	-2.22369	down	--	--	--
pmf0246	Orientin	Flavonoids	Flavonoid	33146	40200	25900	7996.2	10949	14909	1.12352	0.341114	-1.55167	down	C10114	--	--
pmf0301	Engeletin	Flavonoids	Flavonoid	601040	614090	593430	1682700	1531200	1576300	1.20893	2.64863	1.40524	up	--	--	--
pmf0372	Pedalitin	Flavonoids	Flavonoid	875460	974270	764150	234510	172940	250280	1.19	0.25163	-1.99063	down	C10119	--	--
pmf0383	5,7-Dihydroxy-3',4',5'-trimethoxyflavone	Flavonoids	Flavonoid	466880	459840	430260	9	9	9	1.21141	1.98971e-05	-15.6171	down	C19807	--	--
pmf0521	Morin	Flavonoids	Flavonoid	121400	88808	116930	259010	251760	330960	1.16823	2.57301	1.36346	up	C10105	--	--
pmf0549	Diosmin	Flavonoids	Flavonoid	4566000	4927200	6197200	1833700	2327700	2459100	1.15951	0.421946	-1.24487	down	C10039	--	--
pmf0583	Phloridzin	Flavonoids	Flavonoid	3480700	4183700	3534000	1423500	1387500	1117700	1.19199	0.350827	-1.51117	down	C01604	ko00941,ko01110	ko00941,ko01110
pmb0711	Quercetin 7-O-rutinoside	Flavonoids	Flavonol	1018000	996320	2681100	109810	172450	125760	1.15878	0.0868974	-3.52454	down	--	--	ko00941,ko00944,ko01100,ko01110,ko04152
pmb3894	Di-O-methylquercetin	Flavonoids	Flavonol	1059300	396030	659900	15617000	6516200	10450000	1.16761	15.4041	3.94524	up	--	--	--
pme0196	Kaempferol	Flavonoids	Flavonol	18909	24835	19677	68768	60034	72911	1.19242	3.18054	1.66927	up	C05903	ko00941,ko00944,ko01061,ko01100,ko01110	ko00941,ko00944,ko01061,ko01100,ko01110
pme1622	Kaempferol 3-O-glucoside (Astragalin)	Flavonoids	Flavonol	653440	748580	752830	1427100	1584600	1502000	1.19841	2.09467	1.06672	up	C12249	ko00944,ko01110	ko00944,ko01110
pme2493	Kaempferol 3,7-dirhamnoside (Kaempferitrin)	Flavonoids	Flavonol	10512000	9171500	7977100	747980	921020	1086300	1.20327	0.099611	-3.32755	down	C16981	--	--
pme2898	Dihydromyricetin	Flavonoids	Flavonol	116630	233650	228980	1571900	1462600	1638600	1.18417	8.06736	3.0121	up	C02906	ko00941,ko01110	ko00941,ko01110
pme2954	Quercetin	Flavonoids	Flavonol	70724	50448	41554	147740	187520	179100	1.16214	3.1609	1.66033	up	C00389	ko00941,ko00944,ko01100,ko01110,ko04152	ko00941,ko00944,ko01100,ko01110,ko04152
pme3267	Kaempferol 3-O-galactoside (Trifolin)	Flavonoids	Flavonol	334660	402860	403900	3599500	3184400	3472300	1.20879	8.98547	3.16759	up	C12626	ko00944	ko00944
pme3290	3,7-Di-O-methylquercetin	Flavonoids	Flavonol	82453	70387	84724	9	9	9	1.21125	0.000113654	-13.1031	down	C01265	ko00944	ko00944
pme1578	Genistein (4',5,7-Trihydroxyisoflavone)	Flavonoids	Isoflavone	802780	679550	714090	3986000	3223600	4117000	1.20392	5.15685	2.36649	up	C06563	ko00943,ko01061,ko01110	ko00943,ko01061,ko01110
pme3208	Glycitin	Flavonoids	Isoflavone	2685900	2924500	3204800	7049300	7124800	5845200	1.18788	2.271	1.18333	up	C16195	ko00943	ko00943
pme3210	Genistein 7-O-Glucoside (Genistin)	Flavonoids	Isoflavone	3421400	3734400	4030300	7077900	8067100	7807400	1.1947	2.05187	1.03694	up	C09126	ko00943	ko00943
pme3233	Calycosin	Flavonoids	Isoflavone	1825000	1556000	1525400	4695900	5416800	5363800	1.20184	3.15435	1.65734	up	C01562	ko00943,ko01110	ko00943,ko01110
pme3252	Glycitein	Flavonoids	Isoflavone	1945200	1714900	1601100	5149400	5713300	6047600	1.20183	3.21415	1.68444	up	C14536	ko00943,ko01110	ko00943,ko01110
pme3279	2'-Hydroxygenistein	Flavonoids	Isoflavone	9	9	9	824990	1392700	1013500	1.21104	119674	16.8687	up	C12134	ko00943	ko00943
pme3400	Sissotrin	Flavonoids	Isoflavone	69565	92187	52842	455520	317450	645300	1.16649	6.60909	2.72445	up	C05376	ko00943	ko00943
pmb2947	Catechin-catechin-catechin	Flavonoids	Polyphenol	290580	251000	505720	37261	36725	53560	1.17746	0.121786	-3.03759	down	--	--	--
pme0460	L-Epicatechin	Flavonoids	Polyphenol	3444600	3842300	3770000	1165000	1313100	1452700	1.19952	0.355507	-1.49205	down	C09727	ko00941,ko01061,ko01110	ko00941,ko01061,ko01110
pme1824	Protocatechuic acid	Flavonoids	Polyphenol	6808000	7104400	7135000	42923000	45729000	51271000	1.20958	6.64799	2.73292	up	C00230	ko00362,ko00400,ko00623,ko00624,ko00627,ko01061,ko01100,ko01110,ko01120,ko01130,ko01220	ko00362,ko00400,ko00623,ko00624,ko00627,ko01061,ko01100,ko01110,ko01120,ko01130,ko01220
pme2478	Protocatechuic aldehyde	Flavonoids	Polyphenol	9	9	9	348180	388970	361220	1.21139	40680.4	15.312	up	C16700	ko00950,ko01063	ko00950,ko01063
pmf0345	(-)-Epiafzelechin	Flavonoids	Polyphenol	2968500	3560400	2871700	6852100	8353400	6950900	1.18382	2.35691	1.2369	up	C12128	ko00941,ko01110	ko00941,ko01110
pmf0458	6-Gingerol	Flavonoids	Polyphenol	915450	501500	369980	11586000	5911500	10190000	1.17658	15.4945	3.95368	up	C10462	ko00945,ko01110	ko00945,ko01110
pme0432	Procyanidin A2	Flavonoids	Proanthocyanidins	553340	535800	764010	129110	153240	155520	1.19159	0.236284	-2.08141	down	C10237	--	--
pme0434	Procyanidin B2	Flavonoids	Proanthocyanidins	13263000	12123000	14265000	2966900	3859800	4642900	1.18216	0.289264	-1.78954	down	--	--	ko00942
pme0436	Procyanidin B3	Flavonoids	Proanthocyanidins	43616	43790	49683	6609.4	7320.9	14588	1.15666	0.208028	-2.26515	down	--	--	ko00942
